# Supplementary material for: Polyoxometalates-mediated facile synthesis of Pt nanoparticles anchored on an ordered mesoporous carbon for electrochemical applications
Source: Royal Society of Chemistry journal article supplement (doi:10.1039/c6ra19995j), 2016-01-01
Supplement: c6ra19995j1.pdf [file c6ra19995j1.pdf]

## Polyoxometalates-mediated facile synthesis of Pt nanoparticles anchored on ordered mesoporous carbon for electrochemical applications

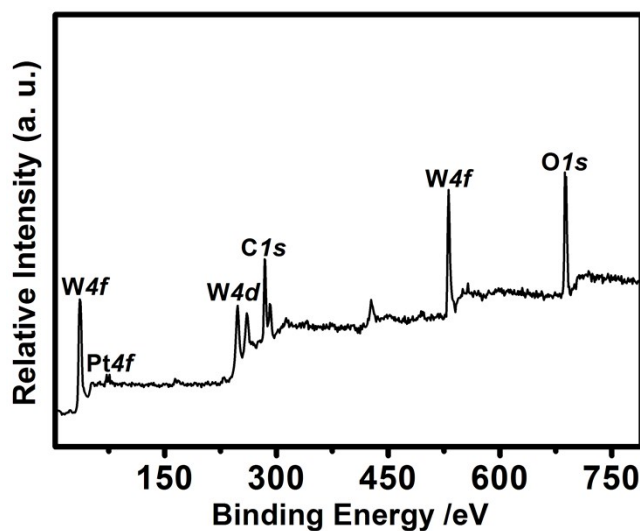

Fig. S1 The wide survey spectrums of Pt@POMs-OMC nanohybrids.

**Table S1** Comparison of the  $R_{ct}$  and response to  $K_3Fe(CN)_6/K_4Fe(CN)_6$  with different electrodes  
(for five determinations)

| Electrode             | bare GCE | OMC-GCE | Pt@POMs-OMC-GCE |
|-----------------------|----------|---------|-----------------|
| $R_{ct}$ ( $\Omega$ ) | 342.7    | 15.8    | 9.6             |

**Table S2** Comparison of the performance of the Pt@POMs-OMC-GCE for the electrochemical detection of hydrazine with that of other modified electrodes.

| Working electrode                                       | potential (V)          | Linear range<br>( $\mu\text{M}$ ) | sensitivity<br>( $\mu\text{A mM}^{-1}$ ) | Limit of<br>detection ( $\mu\text{M}$ ) | Reference |
|---------------------------------------------------------|------------------------|-----------------------------------|------------------------------------------|-----------------------------------------|-----------|
| RGO/ZnO-Au/GCE <sup>a</sup>                             | 0.1 (Ag/AgCl)          | 0.05-5                            | 393.34                                   | 0.018                                   | 1         |
| PA6/PANI_ZnO/FTO <sup>b</sup>                           | 0.19 (Ag/AgCl)         | 0.5-5000                          | 61.77                                    | 0.35                                    | 2         |
| Ag/ZIF-8/CPE <sup>c</sup>                               | -0.05 (Ag/AgCl)        | 6-5000                            | 3.87                                     | 1.57                                    | 3         |
| Co <sub>3</sub> O <sub>4</sub> NWs/GCE <sup>d</sup>     | 0.5 (Ag/AgCl)          | 20-700                            | 28.63                                    | 0.5                                     | 4         |
| Nafion-TiO <sub>2</sub> -CNT/GCE <sup>e</sup>           | 0.4 (Ag/AgCl)          | 0.35-162                          | 58                                       | 0.22                                    | 5         |
| rGO-PxDA-Pd/GCE <sup>f</sup>                            | 0.1 (Ag/AgCl)          | 1-7433                            | 15.2                                     | 0.17                                    | 6         |
| Co <sub>3</sub> O <sub>4</sub> /MWCNTs/GCE <sup>g</sup> | 0.5 (SCE) <sup>l</sup> | 20-1100                           | 34.5                                     | 0.8                                     | 7         |
| Pt-Cu@PSi/CILE <sup>h</sup>                             | 0 (Ag/AgCl)            | 0.2-1680                          | 10.35                                    | 0.05                                    | 8         |
| PNi-TPPS <sub>4</sub> -NPs/GCE <sup>i</sup>             | 0.55 (Ag/AgCl)         | 1-400                             | 0.99                                     | 0.11                                    | 9         |
| Au/PDTYB/MWCNTs/GCE <sup>j</sup>                        | 0.08 (Ag/AgCl)         | 2-350                             | 41.63                                    | 0.6                                     | 10        |
| PB@Ag/GF <sup>k</sup>                                   | 0.3 (Ag/AgCl)          | 0.5-8.5                           | 26.06                                    | 0.49                                    | 11        |
| Pt@POMs-OMC-GCE                                         | 0 (Ag/AgCl)            | 10-840<br>840-1400                | 2.92<br>7.32                             | 3.41                                    | This work |

a Reduced graphene oxide nanosheets/ZnO microspheres-Au nanoparticles modified glassy carbon electrode

b Polyamide 6/polyaniline (PA6/PANI) electrospun nanofibers decorated with ZnO nanoparticles modified fluorine doped tin oxide electrode

c Ag/zeolitic imidazolate frameworks nanocomposite modified glassy carbon electrode

d Porous Co<sub>3</sub>O<sub>4</sub> nanowire modified glassy carbon electrode

e Nafion-coated titanium oxide nanoparticle deposition on carbon nanotube surfaces modified glassy carbon electrode

f Graphene functionalized by benzylamine molecules and subsequently palladium modified glassy carbon electrode

g Co<sub>3</sub>O<sub>4</sub> nanoparticles decorated on the multi-walled carbon nanotubes modified glassy carbon electrode

h Pt-Cu nanoalloy was supported on the surface of porous silicon modified carbon ionic liquid electrode

i Poly-(5, 10, 15, 20-tetra (4-sulfophenyl) porphyrin-nickel) modified glassy carbon electrode

j Poly (4, 5-dihydro-1, 3-thiazol-2-ylsulfanyl-3-methyl-1, 2-benzenediol)-gold nanoparticles film on multi-walled carbon nanotubes modified glassy carbon electrode

k Prussian blue/silver nanoparticles modified freestanding graphite felt

l Saturated calomel electrode

**Table S3** Comparison of the performance of the Pt@POMs-OMC-GCE for the electrochemical detection of H<sub>2</sub>O<sub>2</sub> with that of other modified electrodes.

| Working electrode                                      | potential (V)            | Linear range<br>( $\mu\text{M}$ ) | sensitivity<br>( $\mu\text{A mM}^{-1}$ ) | Limit of<br>detection ( $\mu\text{M}$ ) | Reference |
|--------------------------------------------------------|--------------------------|-----------------------------------|------------------------------------------|-----------------------------------------|-----------|
| Cu/PSi/CPE <sup>a</sup>                                | -0.2 (Ag/AgCl)           | 0.5-3780                          | 13.09                                    | 0.27                                    | 12        |
| NP-PtAu/GCE <sup>b</sup>                               | 0.7 (RHE <sup>l</sup> )  | 50-2750                           | 1.43                                     | 0.1                                     | 13        |
| PpPDA@Fe <sub>3</sub> O <sub>4</sub> /GCE <sup>c</sup> | -0.4 (SCE <sup>m</sup> ) | 0.5-400                           | 76                                       | 0.21                                    | 14        |
| GF/Co <sub>3</sub> O <sub>4</sub> -NP/GCE <sup>d</sup> | -0.48 (Ag/AgCl)          | 0.2-211.5                         | 90.97                                    | 0.06                                    | 15        |
| TOAB/ZnPP-C <sub>60</sub> /GCE <sup>e</sup>            | -1.17 (Ag/AgCl)          | 35-3400                           | 215.6                                    | 0.81                                    | 16        |
| HRP/C-Dots/LDHs/GCE <sup>f</sup>                       | -0.35 (SCE)              | 0.1-23.1                          | 37.51                                    | 0.04                                    | 17        |
| Pt/Pt/GCE <sup>g</sup>                                 | 0.14 (Ag/AgCl)           | 1-1477                            | 27.22                                    | 0.5                                     | 18        |
| Au NPs-N-GQDs/GCE <sup>h</sup>                         | -0.4 (Ag/AgCl)           | 0.25-13327                        | 14.86                                    | 0.12                                    | 19        |
| PPy-Pt/GCE <sup>i</sup>                                | -0.175 (Ag/AgCl)         | 500-6300                          | 13.16                                    | 0.6                                     | 20        |
| graphene/pectin-CuNPs/GCE <sup>j</sup>                 | -0.24 (Ag/AgCl)          | 1-1000                            | 31.20                                    | 0.35                                    | 21        |
| Pt-MnO <sub>x</sub> @C/GCE <sup>k</sup>                | 0.4 (Ag/AgCl)            | 2-4000                            | 9.81                                     | 0.7                                     | 22        |
| Pt@POMs-OMC-GCE                                        | -0.16 (Ag/AgCl)          | 5-5400                            | 10.64                                    | 1.09                                    | This work |

a Copper on porous silicon nanocomposite modified carbon paste electrode

b Nanoporous Pt-Au alloy modified glassy carbon electrode

c Poly(*p*-phenylenediamine) (PpPDA)-Fe<sub>3</sub>O<sub>4</sub> nanocomposite modified glassy carbon electrode

d Graphene and cobalt oxide nanoparticles composite modified glassy carbon electrode

e Zinc porphyrin-fullerene was entrapped in tetraoctylammonium bromide film modified glassy carbon electrode

f Carbon nanodots and CoFe layered double hydroxide composites modified glassy carbon electrode

g Pt nanoparticles decorated porous grapheme nanocomposite modified glassy carbon electrode

h Au nanoparticles on nitrogen-doped graphene quantum dots modified glassy carbon electrode

i Polypyrrole/platinum nanocomposite modified glassy carbon electrode

j Graphene/pectin/copper nanoparticles modified glassy carbon electrode

k carbon supported Pt-MnO<sub>x</sub> nanoparticles modified glassy carbon electrode

l Reversible hydrogen electrode

m Saturated calomel electrode

**Table S4** Comparison of the performance of the Pt@POMs-OMC-GCE for the electrochemical detection of NB with that of other modified electrodes.

| Working electrode                         | potential (V)            | Linear range<br>( $\mu\text{M}$ ) | sensitivity<br>( $\mu\text{A mM}^{-1}$ ) | Limit of<br>detection ( $\mu\text{M}$ ) | Reference |
|-------------------------------------------|--------------------------|-----------------------------------|------------------------------------------|-----------------------------------------|-----------|
| RGO-AgNPs/GCE <sup>a</sup>                | -0.45 (Ag/AgCl)          | 0.5-900                           | 59.36                                    | 0.26                                    | 23        |
| Pd-GG-g-PAM-silica/GCE <sup>b</sup>       | -0.6 (SCE <sup>k</sup> ) | 1-3900                            | 26                                       | 0.06                                    | 24        |
| NPC/GCE <sup>c</sup>                      | -0.62 (Ag/AgCl)          | 2-100                             | 126                                      | 0.62                                    | 25        |
| PNMPC/Nafion/GCE <sup>d</sup>             | -0.7 (Ag/AgCl)           | 1-200                             | 6.93                                     | 0.05                                    | 26        |
| MMPCMs/GCE <sup>e</sup>                   | -0.64 (SCE)              | 0.2-40                            | 2360                                     | 0.008                                   | 27        |
| BiF/CPE <sup>f</sup>                      | -0.65 (SCE)              | 1-100                             | 289                                      | 0.83                                    | 28        |
| OMC/DDAB/GCE <sup>g</sup>                 | -0.5 (Ag/AgCl)           | 20-2900                           | -                                        | 10                                      | 29        |
| EAG/SPCE <sup>h</sup>                     | -0.624 (Ag/AgCl)         | 0.3-374.5                         | 102.6                                    | 0.06                                    | 30        |
| SiO <sub>2</sub> /Au NPs/GCE <sup>i</sup> | -0.74 (Ag/AgCl)          | 0.1-25                            | 102                                      | 0.1                                     | 31        |
| HMDE <sup>j</sup>                         | -0.8 (Ag/AgCl)           | 14.7-1000                         | -                                        | 5                                       | 32        |
| Pt@POMs-OMC-GCE                           | -0.59 (Ag/AgCl)          | 3.98-672.55                       | 102.62                                   | 3.82                                    | This work |

a Silver nanoparticles decorated reduced graphene oxide modified glassy carbon electrode

b Palladium nanoparticles decorated guar gum grafted polyacrylamide polymer-silica nanocomposite modified glassy carbon electrode

c Nitrogen doped porous carbon modified glassy carbon electrode

d Pt nanoparticles ensemble on macroporous carbon hybrid nanocomposites/Nafion modified glassy carbon electrode

e Macro-/meso-porous carbon materials were modified on the surface of a glassy carbon electrode

f A bismuth-film modified carbon paste electrode

g Ordered mesoporous carbon/didodecyldimethylammonium bromide composites film coated glassy carbon electrode

h Electrochemically activated graphite modified screen printed carbon electrode

i Silica-stabilized gold nanoparticles modified glassy carbon electrode

j Hanging mercury drop electrode

k Saturated calomel electrode

## References

1. R. Madhu, B. Dinesh, S.-M. Chen, R. Saraswathi and V. Mani, *RSC Adv.*, 2015, **5**, 54379–54386.
2. R. S. Andre, A. Pavinatto, L. A. Mercante, E. C. Paris, L. H. C. Mattoso and D. S. Correa, *RSC Adv.*, 2015, **5**, 73875–73881.
3. A. Samadi-Maybodi, S. Ghasemi and H. Ghaffari-Rad, *Sens. Actuators, B*, 2015, **220**, 627–633.
4. J. Zhang, W. Gao, M. Dou, F. Wang, J. Liu, Z. Li and J. Ji, *Analyst*, 2015, **140**, 1686–1692.
5. S. P. Kim and H. C. Choi, *Sens. Actuators, B*, 2015, **207**, Part A, 424–429.
6. A. Ejaz, M. S. Ahmed and S. Jeon, *Sens. Actuators, B*, 2015, **221**, 1256–1263.
7. J. Zhang, H. Liu, M. Dou, F. Wang, J. Liu, Z. Li and J. Ji, *Electroanalysis*, 2015, **27**, 1188–1194.
8. A. A. Ensafi, M. M. Abarghoui and B. Rezaei, *Electrochim. Acta*, 2016, **190**, 199–207.
9. S. H. Kazemi, B. Hosseinzadeh and S. Zakavi, *Sens. Actuators, B*, 2015, **210**, 343–348.
10. A. R. Fakhari, H. Ahmar, H. Hosseini and S. Kazemi Movahed, *Sens. Actuators, B*, 2015, **213**, 82–91.
11. J. Zhao, J. Liu, S. Tricard, L. Wang, Y. Liang, L. Cao, J. Fang and W. Shen, *Electrochim. Acta*, 2015, **171**, 121–127.
12. A. A. Ensafi, M. M. Abarghoui and B. Rezaei, *Sens. Actuators, B*, 2014, **196**, 398–405.
13. J. Wang, H. Gao, F. Sun and C. Xu, *Sens. Actuators, B*, 2014, **191**, 612–618.
14. M. Baghayeri, E. Nazarzadeh Zare and M. Mansour Lakouraj, *Biosens. Bioelectron.*, 2014, **55**, 259–265.
15. C. Karuppiyah, S. Palanisamy, S.-M. Chen, V. Veeramani and P. Periakaruppan, *Sens. Actuators, B*, 2014, **196**, 450–456.
16. H. Wu, S. Fan, X. Jin, H. Zhang, H. Chen, Z. Dai and X. Zou, *Anal. Chem.*, 2014, **86**, 6285–6290.

17. Y. Wang, Z. Wang, Y. Rui and M. Li, *Biosens. Bioelectron.*, 2015, **64**, 57–62.
18. J. Liu, X. Bo, Z. Zhao and L. Guo, *Biosens. Bioelectron.*, 2015, **74**, 71–77.
19. J. Ju and W. Chen, *Anal. Chem.*, 2015, **87**, 1903–1910.
20. L. Xing, Q. Rong and Z. Ma, *Sens. Actuators, B*, 2015, **221**, 242–247.
21. V. Mani, R. Devasenathipathy, S.-M. Chen, S.-F. Wang, P. Devi and Y. Tai, *Electrochim. Acta*, 2015, **176**, 804–810.
22. H. Kivrak, O. Alal and D. Atbas, *Electrochim. Acta*, 2015, **176**, 497–503.
23. C. Karuppiyah, K. Muthupandi, S.-M. Chen, M. A. Ali, S. Palanisamy, A. Rajan, P. Prakash, F. M. A. Al-Hemaid and B.-S. Lou, *RSC Adv.*, 2015, **5**, 31139–31146.
24. P. K. Rastogi, V. Ganesan and S. Krishnamoorthi, *Electrochim. Acta*, 2014, **147**, 442–450.
25. L. Yan, X. Bo, Y. Zhang and L. Guo, *Electrochim. Acta*, 2014, **137**, 693–699.
26. Y. Zhang, L. Zeng, X. Bo, H. Wang and L. Guo, *Anal. Chim. Acta*, 2012, **752**, 45–52.
27. J. Ma, Y. Zhang, X. Zhang, G. Zhu, B. Liu and J. Chen, *Talanta*, 2012, **88**, 696–700.
28. L. Luo, X. Wang, Y. Ding, Q. Li, J. Jia and D. Deng, *Anal. Methods*, 2010, **2**, 1095–1100.
29. B. Qi, F. Lin, J. Bai, L. Liu and L. Guo, *Mater. Lett.*, 2008, **62**, 3670–3672.
30. B. Thirumalraj, S. Palanisamy and S. Chen, *Int. J. Electrochem. Sci.*, 2015, **10**, 4173–4182.
31. S. Singh, P. Devi, D. Singh, D. Jain and M. Singla, *Gold Bull.*, 2012, **45** (2), 75–81.
32. S. Liang, H. Zhang and D. Lu, *Environ. Monit. Assess.*, 2007, **129** (1-3), 331–337.
